# Supplementary material for: A three-dimensional Cu nanobelt cathode for highly efficient electrocatalytic nitrate reduction
Source: Royal Society of Chemistry journal article supplement (doi:10.1039/c9nr10743f), 2020-01-01
Supplement: c9nr10743f1.pdf [file c9nr10743f1.pdf]

1  
2  
3  
4  
5  
6  
7  
8  
9  
10  
11  
12  
13  
14  
15  
16  
17  
18  
19  
20  
21  
22  
23  
24  
25

## Supplementary Information

### Three-dimensional Cu Nanobelt Cathode for Highly Efficient Electrocatalytic Nitrate Reduction

Xiaodan Wang, Mengqi Zhu, Guoshen Zeng, Xun Liu, Chihhsiang Fang,  
Chuanhao Li\*

School of Environmental Science and Engineering and Guangdong Provincial Key  
Laboratory of Environmental Pollution Control and Remediation Technology, Sun Yat-  
sen University, Guangzhou 510006, China  
E-mail: lichuanh3@mail.sysu.edu.cn

#### Content:

|                                                                                                                                                                         |     |
|-------------------------------------------------------------------------------------------------------------------------------------------------------------------------|-----|
| 1. Calculation of energy utilization efficiency.....                                                                                                                    | S2  |
| 2. A photograph of the samples.....                                                                                                                                     | S3  |
| 3. SEM images of the surface of Cu(OH) <sub>2</sub> nanobelts and 3D Cu nanobelts.....                                                                                  | S4  |
| 4. XRD patterns and XPS spectra of the 3D Cu nanobelts .....                                                                                                            | S5  |
| 5. Effect of calcination temperature on NO <sub>3</sub> <sup>-</sup> -N removal efficiency and the effect of<br>applied potential on energy utilization efficiency..... | S6  |
| 6. Effect of initial pH on nitrate reduction and TN removal.....                                                                                                        | S7  |
| 7. Effect of Cl <sup>-</sup> adding time on nitrate removal .....                                                                                                       | S8  |
| 8. The H <sub>2</sub> O <sub>2</sub> generated at Cu foam and 3D Cu nanobelts cathodes.....                                                                             | S9  |
| 9. Effect of dissolved oxygen on nitrate removal.....                                                                                                                   | S10 |

26 Calculation of energy utilization efficiency

27 The energy utilization efficiency was calculated using the following equations:

$$28 \quad \eta = \frac{\left( Q(\text{NO}_2^- - \text{N})_t + Q(\text{N}_2 - \text{N})_t + Q(\text{NH}_4^+ - \text{N})_t \right)}{Q_t} \times 100\% \quad (1)$$

$$29 \quad Q_t = \frac{\int I dt}{1000} \quad (2)$$

$$30 \quad Q(\text{NO}_2^- - \text{N})_t = 2 \times \left[ \frac{C(\text{NO}_2^- - \text{N})_t \times V}{M_N} \right] \times F \quad (3)$$

$$31 \quad Q(\text{N}_2 - \text{N})_t = 5 \times \left[ \frac{\left( C(\text{NO}_3^- - \text{N})_0 - C(\text{NO}_3^- - \text{N})_t - C(\text{NO}_2^- - \text{N})_t - C(\text{NH}_4^+ - \text{N})_t \right) \times V}{M_N} \right] \times F \quad (4)$$

$$32 \quad Q(\text{NH}_4^+ - \text{N})_t = 8 \times \left[ \frac{C(\text{NH}_4^+ - \text{N})_t \times V}{M_N} \right] \times F \quad (5)$$

33 where  $\eta$  (%) is the electro energy utilization efficiency,  $Q_t$  (C) is the total electric  
34 quantity that provide at time  $t$  (s);  $I$  (mA) is the current;  $Q(\text{NO}_2^- - \text{N})_t$ ,  $Q(\text{N}_2 - \text{N})_t$  and  
35  $Q(\text{NH}_4^+ - \text{N})_t$  (C) are the electric quantities that cost during  $\text{NO}_3^- - \text{N}$  reduction to  $\text{NO}_2^- - \text{N}$ ,  
36  $\text{N}_2 - \text{N}$  and  $\text{NH}_4^+ - \text{N}$  at time  $t$ ;  $V$  is the volume of solution (0.05 L),  $M_N$  is the molar mass  
37 of N (14000 mg mol<sup>-1</sup>) and  $F$  is the Faraday's constant (96487 C mol<sup>-1</sup>).

38

39

40

41

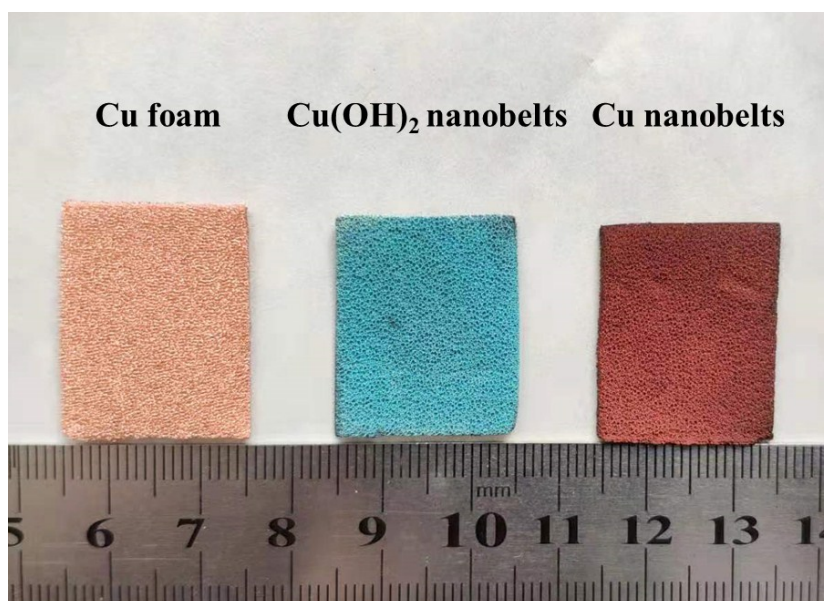

42

43 **Figure S1** Photographs of the Cu foam electrode, Cu(OH)<sub>2</sub> nanobelt electrode and 3D

44 Cu nanobelt electrode.

45

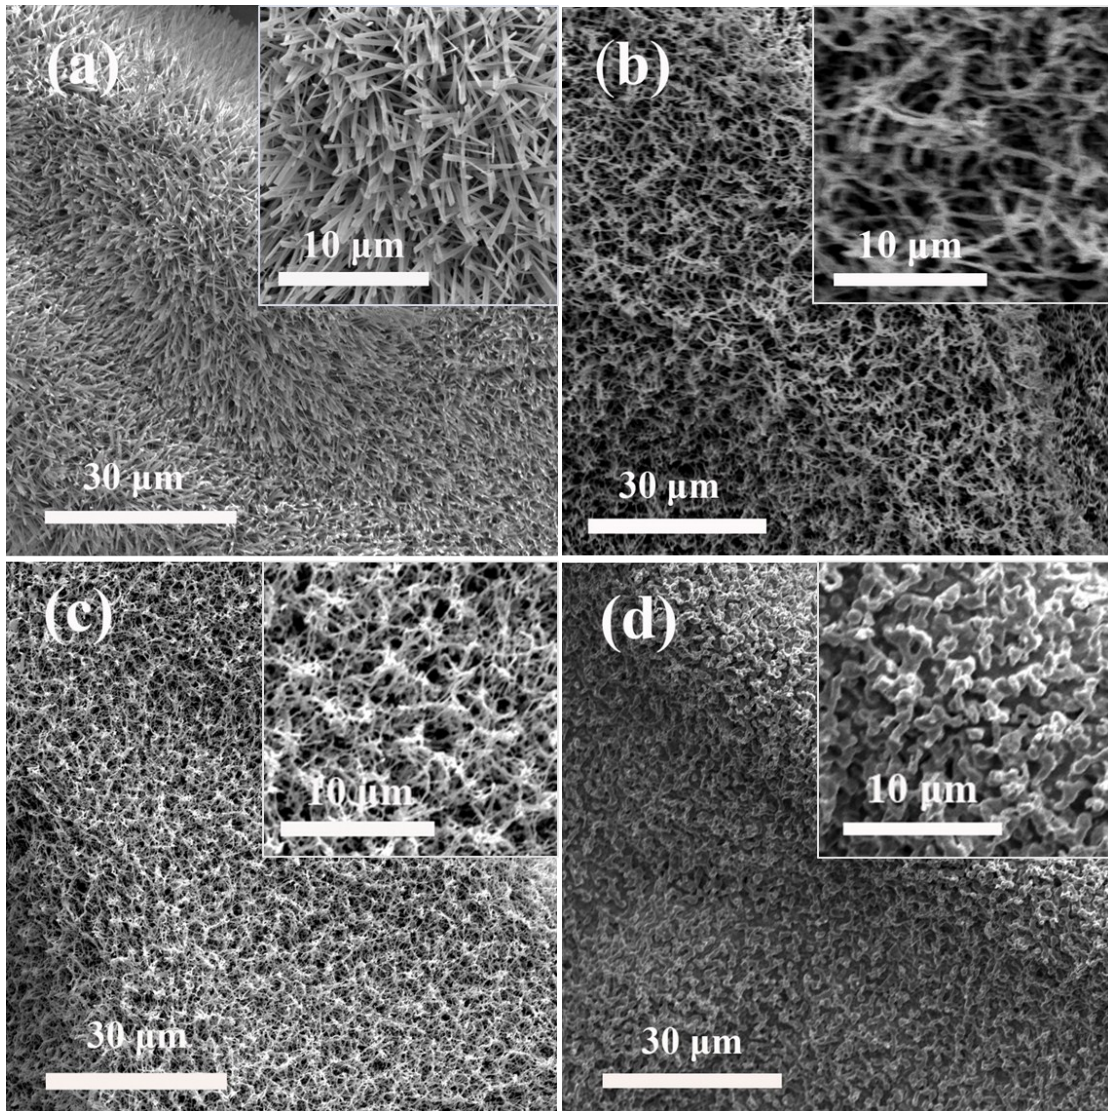

46

47 **Figure S2** (a) SEM images of the surface of  $\text{Cu}(\text{OH})_2$  nanobelts. SEM images of the  
 48 surface of 3D Cu nanobelts obtained at different temperature (b) 300 °C, (c) 400 °C  
 49 and (d) 500 °C.

50

51

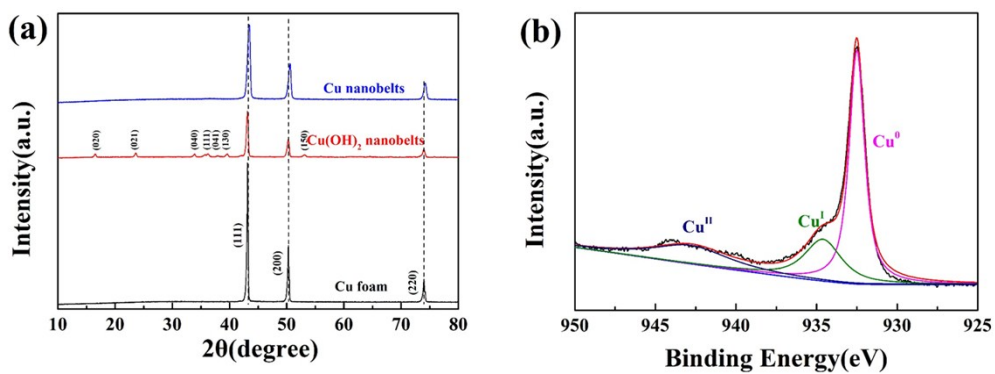

52

53 **Figure S3** (a) XRD patterns of the Cu foam, Cu(OH)<sub>2</sub> nanobelt and 3D Cu nanobelt  
54 electrodes. (b) XPS spectra of the 3D Cu nanobelts.  
55

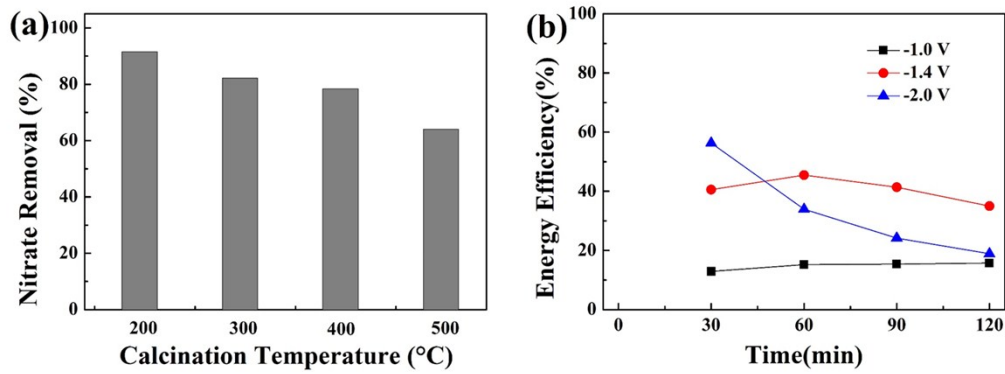

56

57 **Figure S4** (a) Effect of calcination temperature on  $\text{NO}_3^-$ -N removal efficiency. (3D Cu  
 58 nanobelts cathode, 50 mL solution with  $30 \text{ mg L}^{-1} \text{NO}_3^-$ -N, 0.5 h treatment). (b) The  
 59 effect of applied potential on energy utilization efficiency.

60

61

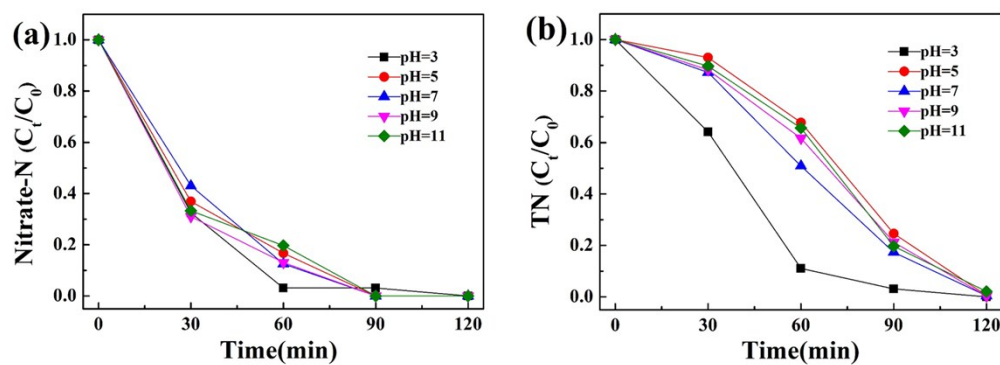

62

63 **Figure S5** (a) Effect of initial pH on nitrate reduction and (b) TN removal. (30 mg/L

64 NO<sub>3</sub><sup>-</sup>-N, -1.4 V vs Ag/AgCl, 0.07 M NaCl, 0.05 M Na<sub>2</sub>SO<sub>4</sub>).

65

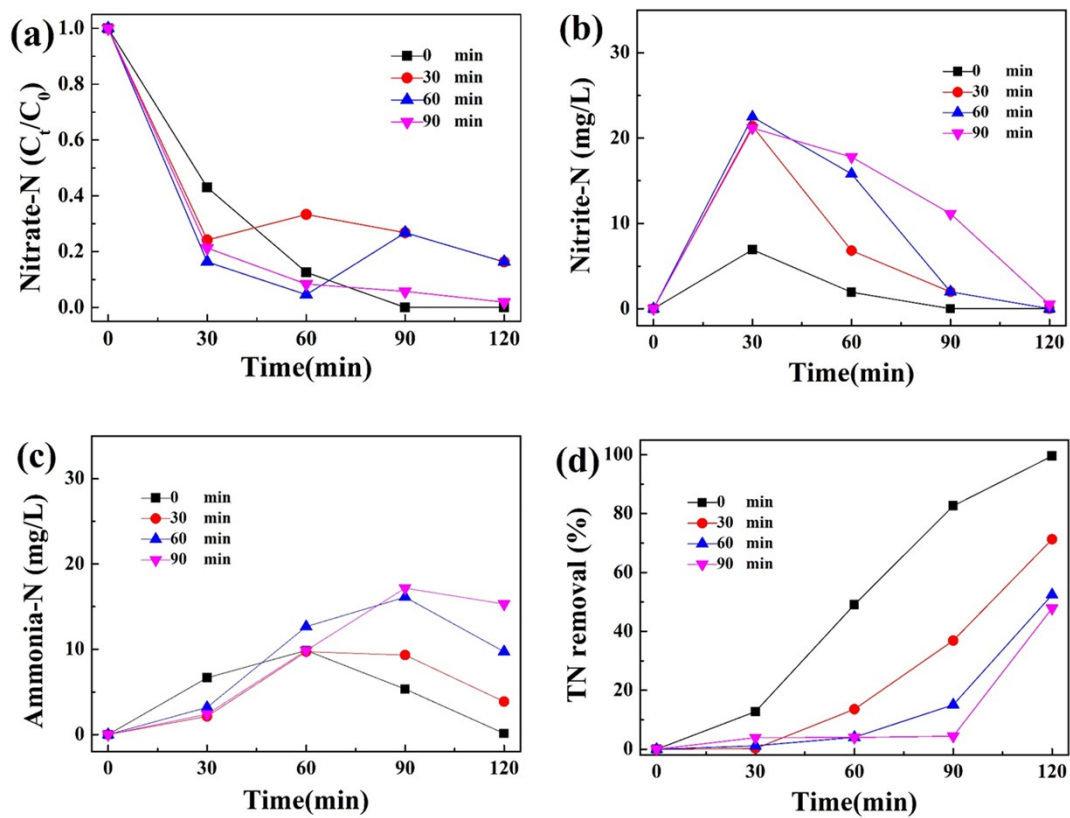

66

67 **Figure S6** Effect of Cl<sup>-</sup> adding time on (a) nitrate removal, (b) nitrite generation, (c)  
 68 ammonia generation and (d) TN removal.

69



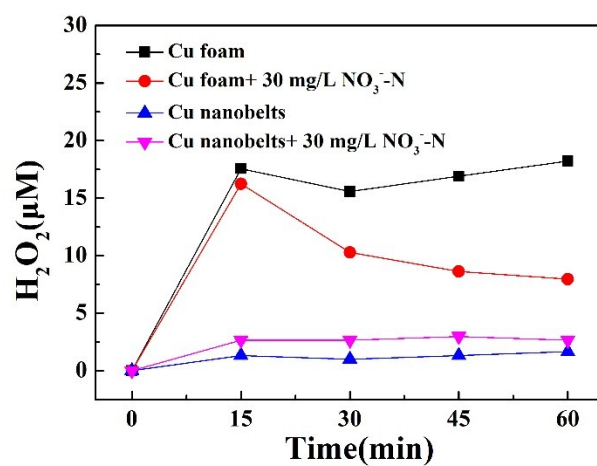

70

71 **Figure S7** The H<sub>2</sub>O<sub>2</sub> generated by Cu foam and 3D Cu nanobelts in the absence and  
 72 presence of nitrate (30 mg/L NO<sub>3</sub><sup>-</sup>-N, -1.4 V vs Ag/AgCl, 0.05 M Na<sub>2</sub>SO<sub>4</sub>).

73

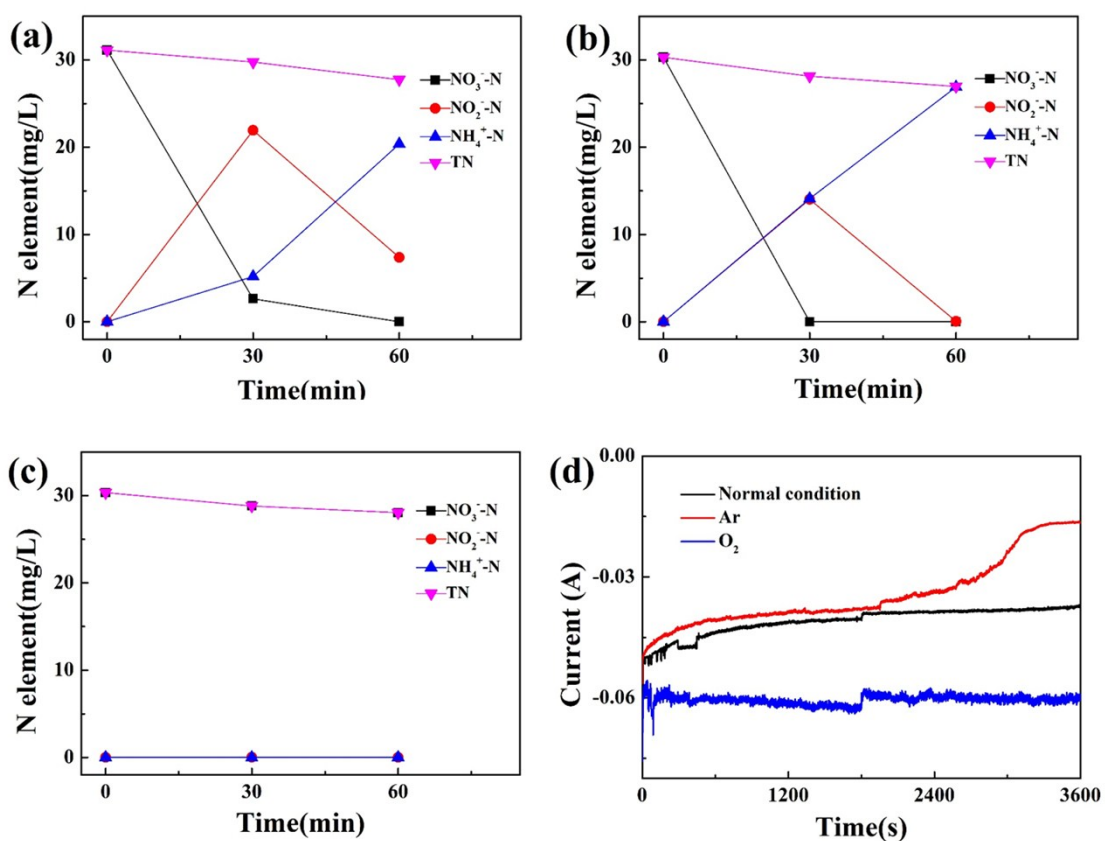

74

75

**Figure S8** Effect of dissolved oxygen on nitrate removal

76 (a) regular condition, (b) Ar-saturated condition, (c) O<sub>2</sub>-saturated condition and (d) the

77 corresponding current-time curve.

78
